# Supplementary material for: Silurian syn- and post-collision granitic magmatism in the western section of the North Qinling Orogen: Implications for collisional orogenic processes
Source: Copernicus journal article supplement (doi:10.5194/egusphere-2024-2100), 2024-10-21
Supplement: Supplementary file 1 [file egusphere-2024-2100-supplement.pdf]

Supplementary table.1 Zircon LA-ICP-MS U-Pb data of the LP and XP in the western section of the NQO

| No <sup>a</sup>         | Th   | U    | Th/U | Isotopicratios                       |        |                                     |        |                                     |        | Apparentages<br>(Ma)                 |     |                                     |     |                                     |    | Concordance |
|-------------------------|------|------|------|--------------------------------------|--------|-------------------------------------|--------|-------------------------------------|--------|--------------------------------------|-----|-------------------------------------|-----|-------------------------------------|----|-------------|
|                         |      |      |      | <sup>207</sup> Pb/ <sup>206</sup> Pb |        | <sup>207</sup> Pb/ <sup>235</sup> U |        | <sup>206</sup> Pb/ <sup>238</sup> U |        | <sup>207</sup> Pb/ <sup>206</sup> Pb |     | <sup>207</sup> Pb/ <sup>235</sup> U |     | <sup>206</sup> Pb/ <sup>238</sup> U |    |             |
|                         |      |      |      |                                      | 1σ     |                                     | 1σ     |                                     | 1σ     |                                      | 1σ  |                                     | 1σ  |                                     | 1σ |             |
| Liqiao pluton TS19001-3 |      |      |      |                                      |        |                                     |        |                                     |        |                                      |     |                                     |     |                                     |    |             |
| 1                       | 1497 | 2237 | 0.67 | 0.0725                               | 0.0235 | 0.7192                              | 0.3430 | 0.0534                              | 0.0011 | 1011                                 | 699 | 550                                 | 203 | 336                                 | 7  | 51%         |
| 2                       | 1068 | 1406 | 0.76 | 0.0549                               | 0.0021 | 0.5086                              | 0.0187 | 0.0669                              | 0.0008 | 409                                  | 90  | 418                                 | 13  | 417                                 | 5  | 99%         |
| 3                       | 3459 | 2267 | 1.53 | 0.1013                               | 0.0041 | 0.9377                              | 0.0355 | 0.0669                              | 0.0012 | 1650                                 | 75  | 672                                 | 19  | 418                                 | 7  | 53%         |
| 4                       | 1369 | 1802 | 0.76 | 0.0556                               | 0.0018 | 0.5369                              | 0.0176 | 0.0695                              | 0.0009 | 435                                  | 72  | 436                                 | 12  | 433                                 | 5  | 99%         |
| 5                       | 4928 | 2494 | 1.98 | 0.0624                               | 0.0022 | 0.5965                              | 0.0202 | 0.0691                              | 0.0011 | 687                                  | 76  | 475                                 | 13  | 430                                 | 7  | 90%         |
| 6                       | 875  | 1020 | 0.86 | 0.0527                               | 0.0021 | 0.5069                              | 0.0206 | 0.0694                              | 0.0011 | 322                                  | 93  | 416                                 | 14  | 432                                 | 6  | 96%         |
| 7                       | 1438 | 1156 | 1.24 | 0.0571                               | 0.0021 | 0.5529                              | 0.0215 | 0.0698                              | 0.0011 | 494                                  | 81  | 447                                 | 14  | 435                                 | 7  | 97%         |
| 8                       | 1608 | 1474 | 1.09 | 0.0566                               | 0.0020 | 0.5485                              | 0.0206 | 0.0696                              | 0.0012 | 476                                  | 78  | 444                                 | 14  | 434                                 | 7  | 97%         |
| 9                       | 1078 | 2240 | 0.48 | 0.0551                               | 0.0018 | 0.5345                              | 0.0178 | 0.0697                              | 0.0010 | 417                                  | 72  | 435                                 | 12  | 434                                 | 6  | 99%         |
| 10                      | 1405 | 2104 | 0.67 | 0.0549                               | 0.0018 | 0.5154                              | 0.0174 | 0.0676                              | 0.0010 | 406                                  | 74  | 422                                 | 12  | 422                                 | 6  | 99%         |
| 11                      | 3006 | 1174 | 2.56 | 0.1334                               | 0.0043 | 1.3260                              | 0.0497 | 0.0708                              | 0.0012 | 2144                                 | 56  | 857                                 | 22  | 441                                 | 7  | 35%         |
| 12                      | 2044 | 1099 | 1.86 | 0.0532                               | 0.0020 | 0.5148                              | 0.0197 | 0.0697                              | 0.0010 | 339                                  | 85  | 422                                 | 13  | 434                                 | 6  | 97%         |
| 13                      | 1601 | 1789 | 0.89 | 0.0596                               | 0.0019 | 0.5556                              | 0.0183 | 0.0672                              | 0.0010 | 587                                  | 70  | 449                                 | 12  | 420                                 | 6  | 93%         |
| 14                      | 6775 | 3198 | 2.12 | 0.1090                               | 0.0042 | 0.6030                              | 0.0215 | 0.0404                              | 0.0006 | 1783                                 | 64  | 479                                 | 14  | 255                                 | 4  | 38%         |
| 15                      | 2047 | 2187 | 0.94 | 0.0572                               | 0.0020 | 0.5522                              | 0.0189 | 0.0696                              | 0.0010 | 498                                  | 76  | 446                                 | 12  | 433                                 | 6  | 97%         |
| 16                      | 1958 | 2411 | 0.81 | 0.0580                               | 0.0036 | 0.5502                              | 0.0320 | 0.0682                              | 0.0018 | 532                                  | 137 | 445                                 | 21  | 425                                 | 11 | 95%         |
| 17                      | 1403 | 1631 | 0.86 | 0.0549                               | 0.0021 | 0.5309                              | 0.0206 | 0.0695                              | 0.0010 | 409                                  | 87  | 432                                 | 14  | 433                                 | 6  | 99%         |
| 18                      | 2420 | 2590 | 0.93 | 0.0598                               | 0.0036 | 0.5713                              | 0.0331 | 0.0687                              | 0.0016 | 594                                  | 130 | 459                                 | 21  | 428                                 | 10 | 93%         |
| 19                      | 924  | 1125 | 0.82 | 0.0528                               | 0.0020 | 0.5072                              | 0.0199 | 0.0691                              | 0.0012 | 320                                  | 85  | 417                                 | 13  | 431                                 | 7  | 96%         |
| 20                      | 1633 | 2806 | 0.58 | 0.0536                               | 0.0017 | 0.5152                              | 0.0165 | 0.0690                              | 0.0008 | 367                                  | 75  | 422                                 | 11  | 430                                 | 5  | 98%         |

|    |      |      |      |        |        |        |        |        |        |     |     |     |    |     |   |     |
|----|------|------|------|--------|--------|--------|--------|--------|--------|-----|-----|-----|----|-----|---|-----|
| 21 | 1191 | 1694 | 0.70 | 0.0551 | 0.0017 | 0.5272 | 0.0172 | 0.0689 | 0.0010 | 413 | 69  | 430 | 11 | 429 | 6 | 99% |
| 22 | 1448 | 2181 | 0.66 | 0.0582 | 0.0019 | 0.5628 | 0.0191 | 0.0695 | 0.0009 | 539 | 72  | 453 | 12 | 433 | 5 | 95% |
| 23 | 1797 | 1907 | 0.94 | 0.0607 | 0.0020 | 0.5862 | 0.0202 | 0.0693 | 0.0009 | 632 | 66  | 468 | 13 | 432 | 6 | 91% |
| 24 | 1129 | 1584 | 0.71 | 0.0541 | 0.0019 | 0.5202 | 0.0185 | 0.0692 | 0.0009 | 376 | 80  | 425 | 12 | 431 | 6 | 98% |
| 25 | 928  | 1294 | 0.72 | 0.0561 | 0.0020 | 0.5401 | 0.0208 | 0.0693 | 0.0011 | 457 | 114 | 438 | 14 | 432 | 7 | 98% |

Liqaiio pluton TS19007-2

|    |      |      |      |        |        |        |        |        |        |      |     |     |    |     |   |     |
|----|------|------|------|--------|--------|--------|--------|--------|--------|------|-----|-----|----|-----|---|-----|
| 1  | 676  | 439  | 1.54 | 0.0588 | 0.0044 | 0.5423 | 0.0371 | 0.0676 | 0.0012 | 567  | 168 | 440 | 24 | 421 | 7 | 95% |
| 2  | 2595 | 4094 | 0.63 | 0.1017 | 0.0043 | 0.9915 | 0.0429 | 0.0698 | 0.0009 | 1655 | 78  | 700 | 22 | 435 | 5 | 53% |
| 3  | 557  | 1514 | 0.37 | 0.0552 | 0.0020 | 0.5294 | 0.0195 | 0.0691 | 0.0008 | 420  | 77  | 431 | 13 | 431 | 5 | 99% |
| 4  | 584  | 973  | 0.60 | 0.0623 | 0.0024 | 0.5931 | 0.0219 | 0.0687 | 0.0009 | 687  | 77  | 473 | 14 | 428 | 5 | 90% |
| 5  | 543  | 341  | 1.59 | 0.0622 | 0.0037 | 0.5838 | 0.0347 | 0.0681 | 0.0015 | 680  | 130 | 467 | 22 | 425 | 9 | 90% |
| 6  | 299  | 1435 | 0.21 | 0.0553 | 0.0021 | 0.5317 | 0.0197 | 0.0690 | 0.0010 | 433  | 83  | 433 | 13 | 430 | 6 | 99% |
| 7  | 1018 | 2383 | 0.43 | 0.0558 | 0.0020 | 0.5395 | 0.0197 | 0.0691 | 0.0010 | 456  | 80  | 438 | 13 | 431 | 6 | 98% |
| 8  | 980  | 972  | 1.01 | 0.0596 | 0.0023 | 0.5724 | 0.0214 | 0.0693 | 0.0012 | 591  | 83  | 460 | 14 | 432 | 7 | 93% |
| 9  | 1269 | 1416 | 0.90 | 0.0549 | 0.0018 | 0.5307 | 0.0174 | 0.0693 | 0.0009 | 409  | 76  | 432 | 12 | 432 | 5 | 99% |
| 10 | 1383 | 1937 | 0.71 | 0.0550 | 0.0019 | 0.5278 | 0.0173 | 0.0688 | 0.0009 | 413  | 71  | 430 | 12 | 429 | 5 | 99% |
| 11 | 1455 | 2259 | 0.64 | 0.0552 | 0.0017 | 0.5319 | 0.0164 | 0.0691 | 0.0009 | 420  | 69  | 433 | 11 | 430 | 5 | 99% |
| 12 | 3153 | 2748 | 1.15 | 0.0614 | 0.0021 | 0.5888 | 0.0217 | 0.0683 | 0.0009 | 654  | 69  | 470 | 14 | 426 | 5 | 90% |
| 13 | 2283 | 2939 | 0.78 | 0.0609 | 0.0018 | 0.5891 | 0.0185 | 0.0690 | 0.0010 | 635  | 63  | 470 | 12 | 430 | 6 | 91% |
| 14 | 1019 | 1263 | 0.81 | 0.0549 | 0.0019 | 0.5307 | 0.0179 | 0.0693 | 0.0009 | 406  | 78  | 432 | 12 | 432 | 6 | 99% |
| 15 | 1847 | 2205 | 0.84 | 0.0812 | 0.0038 | 0.6668 | 0.0232 | 0.0611 | 0.0012 | 1226 | 93  | 519 | 14 | 383 | 7 | 69% |
| 16 | 1139 | 1416 | 0.80 | 0.0549 | 0.0026 | 0.5301 | 0.0245 | 0.0688 | 0.0010 | 409  | 112 | 432 | 16 | 429 | 6 | 99% |
| 17 | 1569 | 1537 | 1.02 | 0.0601 | 0.0023 | 0.5809 | 0.0210 | 0.0692 | 0.0011 | 606  | 83  | 465 | 13 | 431 | 6 | 92% |
| 18 | 823  | 2011 | 0.41 | 0.0597 | 0.0024 | 0.5793 | 0.0241 | 0.0691 | 0.0011 | 591  | 87  | 464 | 15 | 430 | 6 | 92% |
| 19 | 646  | 396  | 1.63 | 0.0611 | 0.0034 | 0.5777 | 0.0318 | 0.0675 | 0.0011 | 643  | 125 | 463 | 20 | 421 | 7 | 90% |
| 20 | 792  | 1095 | 0.72 | 0.0574 | 0.0021 | 0.5561 | 0.0208 | 0.0690 | 0.0010 | 509  | 77  | 449 | 14 | 430 | 6 | 95% |

|    |      |      |      |        |        |        |        |        |        |     |    |     |    |     |   |     |
|----|------|------|------|--------|--------|--------|--------|--------|--------|-----|----|-----|----|-----|---|-----|
| 21 | 581  | 949  | 0.61 | 0.0588 | 0.0022 | 0.6492 | 0.0238 | 0.0789 | 0.0011 | 567 | 81 | 508 | 15 | 489 | 6 | 96% |
| 22 | 1290 | 1904 | 0.68 | 0.0582 | 0.0020 | 0.5598 | 0.0190 | 0.0691 | 0.0011 | 600 | 76 | 451 | 12 | 430 | 7 | 95% |
| 23 | 290  | 693  | 0.42 | 0.0581 | 0.0022 | 0.5602 | 0.0206 | 0.0690 | 0.0010 | 600 | 83 | 452 | 13 | 430 | 6 | 95% |
| 24 | 824  | 1355 | 0.61 | 0.0568 | 0.0019 | 0.5475 | 0.0182 | 0.0690 | 0.0009 | 483 | 81 | 443 | 12 | 430 | 5 | 97% |
| 25 | 1772 | 1865 | 0.95 | 0.0573 | 0.0019 | 0.5544 | 0.0184 | 0.0690 | 0.0008 | 502 | 74 | 448 | 12 | 430 | 5 | 95% |

Xianping pluton TS19014-1

|    |      |      |      |        |        |        |        |        |        |     |     |     |    |     |    |     |
|----|------|------|------|--------|--------|--------|--------|--------|--------|-----|-----|-----|----|-----|----|-----|
| 1  | 1365 | 3052 | 0.45 | 0.0515 | 0.0019 | 0.4924 | 0.0181 | 0.0685 | 0.0011 | 265 | 85  | 407 | 12 | 427 | 6  | 95% |
| 2  | 526  | 1109 | 0.47 | 0.0527 | 0.0020 | 0.5056 | 0.0183 | 0.0689 | 0.0010 | 317 | 118 | 415 | 12 | 429 | 6  | 96% |
| 3  | 415  | 692  | 0.60 | 0.0527 | 0.0024 | 0.4969 | 0.0220 | 0.0679 | 0.0010 | 317 | 104 | 410 | 15 | 423 | 6  | 96% |
| 4  | 1551 | 2317 | 0.67 | 0.0564 | 0.0019 | 0.5350 | 0.0174 | 0.0682 | 0.0009 | 478 | 72  | 435 | 12 | 425 | 6  | 97% |
| 5  | 2024 | 5425 | 0.37 | 0.0546 | 0.0019 | 0.4970 | 0.0160 | 0.0655 | 0.0008 | 394 | 81  | 410 | 11 | 409 | 5  | 99% |
| 6  | 1422 | 3678 | 0.39 | 0.0517 | 0.0052 | 0.5152 | 0.0965 | 0.0553 | 0.0023 | 333 | 225 | 422 | 65 | 347 | 14 | 80% |
| 7  | 653  | 2075 | 0.31 | 0.0551 | 0.0017 | 0.5310 | 0.0174 | 0.0693 | 0.0010 | 417 | 72  | 432 | 12 | 432 | 6  | 99% |
| 8  | 584  | 1539 | 0.38 | 0.0548 | 0.0017 | 0.5090 | 0.0158 | 0.0669 | 0.0008 | 406 | 64  | 418 | 11 | 418 | 5  | 99% |
| 9  | 594  | 1127 | 0.53 | 0.0551 | 0.0020 | 0.5223 | 0.0187 | 0.0684 | 0.0009 | 417 | 77  | 427 | 13 | 426 | 5  | 99% |
| 10 | 674  | 1680 | 0.40 | 0.0571 | 0.0018 | 0.5344 | 0.0173 | 0.0674 | 0.0008 | 494 | 64  | 435 | 11 | 421 | 5  | 96% |
| 11 | 1282 | 2983 | 0.43 | 0.0556 | 0.0020 | 0.5214 | 0.0192 | 0.0677 | 0.0009 | 439 | 81  | 426 | 13 | 423 | 5  | 99% |
| 12 | 1815 | 7797 | 0.23 | 0.0565 | 0.0021 | 0.5297 | 0.0197 | 0.0679 | 0.0015 | 472 | 80  | 432 | 13 | 423 | 9  | 98% |
| 13 | 1337 | 1906 | 0.70 | 0.0572 | 0.0019 | 0.5301 | 0.0189 | 0.0669 | 0.0010 | 498 | 68  | 432 | 13 | 417 | 6  | 96% |
| 14 | 820  | 1502 | 0.55 | 0.0611 | 0.0026 | 0.5570 | 0.0232 | 0.0660 | 0.0010 | 644 | 97  | 450 | 15 | 412 | 6  | 91% |
| 15 | 1090 | 2446 | 0.45 | 0.0585 | 0.0019 | 0.5445 | 0.0175 | 0.0674 | 0.0009 | 550 | 70  | 441 | 12 | 421 | 6  | 95% |
| 16 | 660  | 1478 | 0.45 | 0.0556 | 0.0018 | 0.5177 | 0.0171 | 0.0674 | 0.0009 | 435 | 74  | 424 | 11 | 420 | 5  | 99% |
| 17 | 1698 | 6610 | 0.26 | 0.0563 | 0.0015 | 0.5265 | 0.0149 | 0.0675 | 0.0009 | 465 | 29  | 429 | 10 | 421 | 5  | 98% |
| 18 | 823  | 1637 | 0.50 | 0.0563 | 0.0023 | 0.5193 | 0.0208 | 0.0667 | 0.0011 | 465 | 89  | 425 | 14 | 416 | 7  | 97% |
| 19 | 2830 | 4359 | 0.65 | 0.0554 | 0.0016 | 0.5249 | 0.0157 | 0.0683 | 0.0010 | 432 | 65  | 428 | 10 | 426 | 6  | 99% |
| 20 | 1430 | 3390 | 0.42 | 0.0575 | 0.0018 | 0.5455 | 0.0174 | 0.0685 | 0.0010 | 509 | 67  | 442 | 11 | 427 | 6  | 96% |

|    |      |      |      |        |        |        |        |        |        |     |     |     |    |     |   |     |
|----|------|------|------|--------|--------|--------|--------|--------|--------|-----|-----|-----|----|-----|---|-----|
| 21 | 342  | 815  | 0.42 | 0.0550 | 0.0024 | 0.5055 | 0.0215 | 0.0663 | 0.0009 | 413 | 100 | 415 | 14 | 414 | 5 | 99% |
| 22 | 1413 | 3551 | 0.40 | 0.0548 | 0.0020 | 0.5141 | 0.0185 | 0.0675 | 0.0009 | 467 | 81  | 421 | 12 | 421 | 6 | 99% |
| 23 | 3117 | 9684 | 0.32 | 0.0556 | 0.0017 | 0.5263 | 0.0157 | 0.0682 | 0.0008 | 435 | 70  | 429 | 10 | 425 | 5 | 99% |
| 24 | 744  | 3345 | 0.22 | 0.0551 | 0.0017 | 0.5210 | 0.0161 | 0.0681 | 0.0010 | 413 | 70  | 426 | 11 | 425 | 6 | 99% |
| 25 | 981  | 1490 | 0.66 | 0.0549 | 0.0016 | 0.5208 | 0.0158 | 0.0683 | 0.0009 | 406 | 69  | 426 | 11 | 426 | 5 | 99% |

Xianping pluton TS19014-3

|    |      |       |      |        |        |        |        |        |        |     |     |     |     |     |    |     |
|----|------|-------|------|--------|--------|--------|--------|--------|--------|-----|-----|-----|-----|-----|----|-----|
| 1  | 3198 | 19943 | 0.16 | 0.0520 | 0.0051 | 0.4875 | 0.0279 | 0.0802 | 0.0111 | 283 | 219 | 403 | 19  | 497 | 66 | 79% |
| 2  | 1120 | 2657  | 0.42 | 0.0577 | 0.0019 | 0.5461 | 0.0184 | 0.0681 | 0.0010 | 517 | 72  | 442 | 12  | 425 | 6  | 95% |
| 3  | 905  | 1681  | 0.54 | 0.0512 | 0.0017 | 0.4858 | 0.0161 | 0.0684 | 0.0009 | 250 | 76  | 402 | 11  | 427 | 5  | 94% |
| 4  | 1539 | 3356  | 0.46 | 0.0653 | 0.0036 | 0.5658 | 0.0311 | 0.0625 | 0.0008 | 783 | 117 | 455 | 20  | 391 | 5  | 84% |
| 5  | 923  | 2437  | 0.38 | 0.0517 | 0.0017 | 0.4816 | 0.0153 | 0.0672 | 0.0008 | 333 | 76  | 399 | 10  | 419 | 5  | 95% |
| 6  | 722  | 1371  | 0.53 | 0.0555 | 0.0019 | 0.5221 | 0.0174 | 0.0678 | 0.0008 | 432 | 76  | 427 | 12  | 423 | 5  | 99% |
| 7  | 4218 | 20686 | 0.20 | 0.0656 | 0.0027 | 0.4991 | 0.0233 | 0.0540 | 0.0007 | 794 | 88  | 411 | 16  | 339 | 4  | 80% |
| 8  | 1383 | 4755  | 0.29 | 0.0531 | 0.0016 | 0.4892 | 0.0143 | 0.0662 | 0.0008 | 332 | 67  | 404 | 10  | 413 | 5  | 97% |
| 9  | 1923 | 6004  | 0.32 | 0.0525 | 0.0015 | 0.5022 | 0.0146 | 0.0686 | 0.0008 | 306 | 67  | 413 | 10  | 428 | 5  | 96% |
| 10 | 714  | 2994  | 0.24 | 0.0551 | 0.0018 | 0.5223 | 0.0165 | 0.0681 | 0.0007 | 417 | 79  | 427 | 11  | 424 | 4  | 99% |
| 11 | 1009 | 3343  | 0.30 | 0.0558 | 0.0021 | 0.5338 | 0.0219 | 0.0684 | 0.0014 | 456 | 81  | 434 | 14  | 426 | 9  | 98% |
| 12 | 941  | 2342  | 0.40 | 0.0527 | 0.0020 | 0.5038 | 0.0191 | 0.0683 | 0.0009 | 317 | 119 | 414 | 13  | 426 | 5  | 97% |
| 13 | 1161 | 3727  | 0.31 | 0.0514 | 0.0022 | 0.4790 | 0.0193 | 0.0667 | 0.0009 | 257 | 94  | 397 | 13  | 417 | 5  | 95% |
| 14 | 1548 | 2934  | 0.53 | 0.0548 | 0.0021 | 0.5092 | 0.0203 | 0.0665 | 0.0010 | 467 | 82  | 418 | 14  | 415 | 6  | 99% |
| 15 | 900  | 5815  | 0.15 | 0.0555 | 0.0018 | 0.5242 | 0.0163 | 0.0677 | 0.0010 | 432 | 68  | 428 | 11  | 423 | 6  | 98% |
| 16 | 901  | 2921  | 0.31 | 0.0644 | 0.0019 | 0.5052 | 0.0143 | 0.0564 | 0.0008 | 754 | 58  | 415 | 10  | 354 | 5  | 83% |
| 17 | 2351 | 12052 | 0.20 | 0.0570 | 0.0016 | 0.5217 | 0.0152 | 0.0654 | 0.0008 | 500 | 63  | 426 | 10  | 408 | 5  | 95% |
| 18 | 574  | 1279  | 0.45 | 0.0502 | 0.0026 | 0.5957 | 0.2201 | 0.0520 | 0.0012 | 206 | 119 | 475 | 140 | 327 | 7  | 63% |
| 19 | 737  | 1244  | 0.59 | 0.0562 | 0.0018 | 0.5361 | 0.0169 | 0.0683 | 0.0009 | 461 | 69  | 436 | 11  | 426 | 5  | 97% |
| 20 | 1326 | 5559  | 0.24 | 0.0549 | 0.0018 | 0.5180 | 0.0161 | 0.0679 | 0.0009 | 406 | 74  | 424 | 11  | 423 | 6  | 99% |

|    |      |      |      |        |        |        |        |        |        |      |     |      |    |     |    |     |
|----|------|------|------|--------|--------|--------|--------|--------|--------|------|-----|------|----|-----|----|-----|
| 21 | 541  | 640  | 0.85 | 0.2819 | 0.0169 | 4.1475 | 0.3229 | 0.0925 | 0.0027 | 3373 | 94  | 1664 | 64 | 570 | 16 | 2%  |
| 22 | 1402 | 3612 | 0.39 | 0.0563 | 0.0019 | 0.5358 | 0.0183 | 0.0682 | 0.0011 | 465  | 76  | 436  | 12 | 425 | 7  | 97% |
| 23 | 959  | 3898 | 0.25 | 0.0576 | 0.0016 | 0.5485 | 0.0161 | 0.0681 | 0.0010 | 517  | 61  | 444  | 11 | 425 | 6  | 95% |
| 24 | 1025 | 1763 | 0.58 | 0.0546 | 0.0017 | 0.5148 | 0.0153 | 0.0676 | 0.0007 | 398  | 69  | 422  | 10 | 421 | 4  | 99% |
| 25 | 1189 | 4162 | 0.29 | 0.0541 | 0.0162 | 0.4610 | 0.1367 | 0.0488 | 0.0018 | 372  | 628 | 385  | 95 | 307 | 11 | 77% |

---

Supplementary table.2 Zircon trace element data of the LP and XP in the western section of the NQO

| Contents<br>(ppm)       | La     | Ce   | Pr   | Nd   | Sm   | Eu   | Gd   | Tb   | Dy   | Ho   | Er  | Tm   | Yb  | Lu   |
|-------------------------|--------|------|------|------|------|------|------|------|------|------|-----|------|-----|------|
| Liqiao pluton TS19001-3 |        |      |      |      |      |      |      |      |      |      |     |      |     |      |
| TS19001.TW3.01          | 16.6   | 237  | 24.0 | 130  | 57.5 | 11.5 | 80.4 | 19.5 | 185  | 68.3 | 310 | 73.0 | 715 | 166  |
| TS19001.TW3.02          | 3.07   | 81.8 | 2.69 | 18.7 | 12.4 | 3.68 | 35.8 | 11.3 | 124  | 51.6 | 242 | 58.6 | 571 | 136  |
| TS19001.TW3.03          | 69.7   | 483  | 85.7 | 410  | 177  | 30.6 | 157  | 26.8 | 188  | 51.8 | 218 | 53.8 | 532 | 135  |
| TS19001.TW3.04          | 26.7   | 235  | 33.5 | 195  | 74.0 | 14.4 | 65.1 | 10.5 | 80.8 | 28.2 | 131 | 32.8 | 343 | 87.1 |
| TS19001.TW3.05          | 81.4   | 658  | 106  | 611  | 226  | 45.5 | 194  | 28.5 | 177  | 54.1 | 226 | 54.9 | 564 | 140  |
| TS19001.TW3.06          | 0.87   | 53.5 | 1.63 | 12.0 | 6.57 | 1.82 | 16.9 | 4.96 | 58.9 | 24.8 | 128 | 33.5 | 339 | 86.3 |
| TS19001.TW3.07          | 2.81   | 132  | 3.75 | 24.2 | 18.7 | 5.63 | 53.3 | 14.5 | 146  | 52.0 | 224 | 51.0 | 483 | 108  |
| TS19001.TW3.08          | 32.1   | 232  | 5.40 | 29.3 | 20.9 | 5.38 | 65.4 | 18.1 | 186  | 65.6 | 282 | 62.8 | 577 | 125  |
| TS19001.TW3.09          | 2.18   | 70.3 | 2.71 | 14.7 | 8.55 | 2.27 | 21.2 | 6.56 | 77.0 | 32.5 | 164 | 43.3 | 465 | 121  |
| TS19001.TW3.10          | 0.41   | 69.1 | 0.59 | 3.88 | 4.58 | 1.75 | 24.1 | 7.81 | 95.7 | 40.9 | 206 | 53.2 | 560 | 144  |
| TS19001.TW3.11          | 34.7   | 307  | 39.1 | 192  | 90.5 | 15.7 | 99.2 | 22.1 | 182  | 56.0 | 238 | 55.3 | 525 | 118  |
| TS19001.TW3.12          | 5.63   | 301  | 3.28 | 26.0 | 26.1 | 7.57 | 94.5 | 25.9 | 259  | 88.7 | 359 | 75.3 | 638 | 133  |
| TS19001.TW3.13          | 18.8   | 211  | 26.5 | 152  | 73.0 | 13.1 | 89.3 | 19.5 | 164  | 57.7 | 265 | 65.8 | 665 | 167  |
| TS19001.TW3.14          | 124    | 1017 | 172  | 903  | 412  | 71.3 | 327  | 48.5 | 276  | 67.4 | 258 | 58.6 | 579 | 140  |
| TS19001.TW3.15          | 16.5   | 141  | 18.0 | 91.6 | 38.9 | 7.56 | 47.5 | 10.1 | 93.1 | 33.8 | 163 | 39.9 | 420 | 111  |
| TS19001.TW3.16          | 33.6   | 234  | 30.1 | 141  | 61.0 | 12.4 | 76.0 | 15.2 | 139  | 49.9 | 219 | 50.3 | 500 | 126  |
| TS19001.TW3.17          | 0.15   | 75.0 | 0.13 | 2.29 | 4.81 | 1.89 | 27.0 | 9.30 | 111  | 46.3 | 220 | 54.3 | 541 | 127  |
| TS19001.TW3.18          | 42.1   | 349  | 56.2 | 336  | 159  | 29.2 | 154  | 20.4 | 155  | 46.0 | 194 | 46.2 | 466 | 115  |
| TS19001.TW3.19          | 0.0077 | 92.1 | 0.18 | 3.10 | 5.65 | 1.69 | 26.5 | 8.87 | 102  | 42.3 | 197 | 47.6 | 466 | 110  |
| TS19001.TW3.20          | 4.60   | 81.6 | 2.80 | 15.6 | 8.79 | 2.28 | 24.5 | 7.68 | 88.9 | 38.7 | 199 | 51.3 | 534 | 140  |
| TS19001.TW3.21          | 7.92   | 121  | 8.18 | 42.4 | 20.2 | 4.69 | 36.4 | 10.4 | 110  | 44.7 | 208 | 50.5 | 497 | 121  |
| TS19001.TW3.22          | 1.58   | 65.5 | 1.66 | 9.4  | 7.29 | 2.02 | 20.7 | 6.21 | 71.5 | 30.2 | 153 | 39.6 | 429 | 114  |

|                |      |      |      |      |      |      |      |      |      |      |     |      |     |     |
|----------------|------|------|------|------|------|------|------|------|------|------|-----|------|-----|-----|
| TS19001.TW3.23 | 21.1 | 189  | 27.4 | 144  | 65.3 | 11.5 | 64.7 | 12.4 | 101  | 36.6 | 174 | 44.5 | 466 | 120 |
| TS19001.TW3.24 | 1.05 | 71.9 | 1.22 | 7.92 | 6.76 | 1.95 | 22.4 | 7.38 | 86.4 | 37.1 | 187 | 47.4 | 491 | 123 |
| TS19001.TW3.25 | 2.29 | 62.5 | 1.03 | 5.92 | 4.51 | 1.40 | 19.7 | 6.67 | 83.7 | 37.4 | 189 | 48.9 | 506 | 128 |

Liqiao pluton TS19007-2

|                |       |      |      |      |      |      |      |      |      |      |      |      |      |      |
|----------------|-------|------|------|------|------|------|------|------|------|------|------|------|------|------|
| TS19007.TW2.01 | 0.87  | 156  | 1.53 | 13.8 | 16.1 | 5.29 | 53.1 | 16.1 | 167  | 56.8 | 239  | 52.5 | 460  | 97.0 |
| TS19007.TW2.02 | 38.8  | 544  | 36.2 | 173  | 99.6 | 31.6 | 163  | 42.6 | 362  | 110  | 465  | 112  | 1138 | 259  |
| TS19007.TW2.03 |       | 62.1 |      | 1.04 | 1.34 | 0.54 | 6.47 | 2.26 | 32.3 | 15.5 | 90.8 | 27.7 | 324  | 84.8 |
| TS19007.TW2.04 | 1.42  | 62.8 | 1.18 | 6.36 | 6.08 | 1.88 | 17.3 | 5.76 | 61.6 | 24.3 | 123  | 33.4 | 365  | 90.0 |
| TS19007.TW2.05 | 0.065 | 111  | 0.36 | 7.06 | 11.2 | 3.60 | 38.7 | 11.1 | 118  | 43.4 | 186  | 41.6 | 377  | 80.3 |
| TS19007.TW2.06 | 0.20  | 32.6 | 0.23 | 1.86 | 1.98 | 0.57 | 6.19 | 2.14 | 25.6 | 11.4 | 68.3 | 20.4 | 252  | 74.1 |
| TS19007.TW2.07 | 0.31  | 107  | 0.51 | 4.00 | 4.71 | 1.67 | 17.7 | 5.75 | 69.4 | 31.5 | 177  | 52.1 | 601  | 159  |
| TS19007.TW2.08 | 0.40  | 95.5 | 0.87 | 6.79 | 7.05 | 2.12 | 23.0 | 7.10 | 77.3 | 29.1 | 137  | 33.8 | 319  | 68.9 |
| TS19007.TW2.09 | 0.10  | 130  | 0.29 | 3.80 | 6.12 | 1.66 | 26.6 | 9.05 | 98.6 | 38.8 | 188  | 47.2 | 457  | 102  |
| TS19007.TW2.10 | 6.82  | 125  | 1.88 | 9.48 | 6.46 | 2.34 | 26.2 | 8.19 | 95.8 | 38.4 | 188  | 47.0 | 486  | 120  |
| TS19007.TW2.11 | 0.10  | 118  | 0.20 | 2.31 | 3.41 | 1.29 | 13.7 | 4.24 | 49.1 | 21.1 | 112  | 31.4 | 347  | 87.6 |
| TS19007.TW2.12 | 2.38  | 217  | 2.33 | 16.8 | 18.1 | 5.15 | 58.2 | 18.2 | 187  | 72.3 | 344  | 89.5 | 905  | 204  |
| TS19007.TW2.13 | 3.98  | 166  | 3.63 | 18.1 | 13.8 | 4.09 | 34.3 | 10.7 | 107  | 38.2 | 185  | 49.0 | 513  | 124  |
| TS19007.TW2.14 | 0.049 | 100  | 0.16 | 2.25 | 3.80 | 1.30 | 16.5 | 5.80 | 66.4 | 27.7 | 138  | 36.4 | 371  | 87.8 |
| TS19007.TW2.15 | 50.7  | 413  | 34.8 | 165  | 121  | 32.2 | 209  | 67.0 | 606  | 177  | 707  | 165  | 1597 | 314  |
| TS19007.TW2.16 | 0.15  | 115  | 0.41 | 3.40 | 5.46 | 1.77 | 21.7 | 7.00 | 80.3 | 33.7 | 172  | 46.1 | 474  | 116  |
| TS19007.TW2.17 | 1.41  | 119  | 2.36 | 16.5 | 16.1 | 4.76 | 41.7 | 12.7 | 136  | 52.0 | 244  | 62.1 | 633  | 147  |
| TS19007.TW2.18 | 0.92  | 63.5 | 1.28 | 7.43 | 5.71 | 1.81 | 15.4 | 4.84 | 53.2 | 20.6 | 99.5 | 26.7 | 288  | 77.1 |
| TS19007.TW2.19 | 18.4  | 149  | 3.27 | 14.8 | 9.06 | 2.58 | 31.6 | 9.13 | 93.0 | 32.4 | 132  | 28.6 | 240  | 49.3 |
| TS19007.TW2.20 | 0.019 | 89.0 | 0.13 | 1.99 | 3.12 | 1.12 | 13.2 | 4.33 | 50.1 | 21.7 | 111  | 30.7 | 328  | 81.3 |
| TS19007.TW2.21 | 0.49  | 74.7 | 0.48 | 3.32 | 3.90 | 1.74 | 13.6 | 4.71 | 53.2 | 20.9 | 104  | 28.6 | 301  | 74.8 |
| TS19007.TW2.22 | 2.98  | 166  | 2.99 | 17.0 | 14.9 | 4.56 | 35.9 | 11.6 | 123  | 45.2 | 212  | 56.6 | 573  | 139  |

|                |      |      |      |      |      |      |      |      |      |      |      |      |     |      |
|----------------|------|------|------|------|------|------|------|------|------|------|------|------|-----|------|
| TS19007.TW2.23 | 0.19 | 31.8 | 0.23 | 1.95 | 1.63 | 0.74 | 6.44 | 2.26 | 25.9 | 11.5 | 58.5 | 16.7 | 189 | 52.2 |
| TS19007.TW2.24 | 0.21 | 83.9 | 0.15 | 2.23 | 4.50 | 1.40 | 20.5 | 6.66 | 77.1 | 30.7 | 142  | 35.0 | 349 | 82.9 |
| TS19007.TW2.25 | 0.85 | 134  | 0.55 | 4.36 | 4.64 | 1.60 | 19.3 | 6.30 | 67.3 | 27.8 | 137  | 37.7 | 384 | 92.3 |

Xianping pluton TS19014-1

|                |       |      |       |      |      |      |      |      |      |      |     |      |      |      |
|----------------|-------|------|-------|------|------|------|------|------|------|------|-----|------|------|------|
| TS19014.TW1.01 | 0.56  | 27.1 | 0.30  | 2.84 | 6.48 | 0.43 | 39.6 | 16.9 | 218  | 91.1 | 431 | 103  | 949  | 203  |
| TS19014.TW1.02 | 2.11  | 32.3 | 0.75  | 4.47 | 4.96 | 0.50 | 24.6 | 9.45 | 116  | 48.7 | 232 | 56.1 | 517  | 113  |
| TS19014.TW1.03 | 76.7  | 236  | 28.0  | 130  | 35.3 | 1.35 | 56.0 | 15.2 | 155  | 60.6 | 254 | 58.3 | 518  | 113  |
| TS19014.TW1.04 | 3.89  | 63.2 | 2.20  | 17.3 | 22.8 | 1.82 | 100  | 35.6 | 416  | 161  | 710 | 161  | 1427 | 299  |
| TS19014.TW1.05 | 2.61  | 35.2 | 2.23  | 11.8 | 18.5 | 1.07 | 81.0 | 35.6 | 426  | 166  | 770 | 180  | 1564 | 321  |
| TS19014.TW1.06 | 0.50  | 41.2 | 0.55  | 4.69 | 9.13 | 0.73 | 54.0 | 21.6 | 270  | 111  | 523 | 125  | 1137 | 244  |
| TS19014.TW1.07 | 7.01  | 37.3 | 1.71  | 7.75 | 5.21 | 0.42 | 29.1 | 11.4 | 145  | 61.9 | 294 | 71.8 | 669  | 148  |
| TS19014.TW1.08 | 0.42  | 32.7 | 0.31  | 3.41 | 6.22 | 0.60 | 35.2 | 14.0 | 178  | 75.9 | 365 | 88.2 | 820  | 180  |
| TS19014.TW1.09 | 8.48  | 52.4 | 3.30  | 18.2 | 8.31 | 0.67 | 29.0 | 10.3 | 127  | 52.4 | 247 | 60.1 | 552  | 122  |
| TS19014.TW1.10 | 0.88  | 26.6 | 0.37  | 3.12 | 5.88 | 0.48 | 34.1 | 12.8 | 160  | 68.0 | 322 | 77.3 | 714  | 156  |
| TS19014.TW1.11 | 0.27  | 23.6 | 0.36  | 3.28 | 8.70 | 0.74 | 53.3 | 22.6 | 290  | 122  | 565 | 135  | 1218 | 263  |
| TS19014.TW1.12 | 1.38  | 28.2 | 0.92  | 5.09 | 11.0 | 1.34 | 59.9 | 27.3 | 357  | 152  | 729 | 180  | 1625 | 346  |
| TS19014.TW1.13 | 1.25  | 30.4 | 0.74  | 5.84 | 8.20 | 0.63 | 35.0 | 13.4 | 169  | 69.1 | 326 | 79.0 | 738  | 157  |
| TS19014.TW1.14 | 0.82  | 42.7 | 0.83  | 6.19 | 8.8  | 0.98 | 43.2 | 15.8 | 193  | 75.5 | 345 | 81.1 | 714  | 152  |
| TS19014.TW1.15 | 1.09  | 37.1 | 1.03  | 6.50 | 10.1 | 0.82 | 48.7 | 19.9 | 244  | 100  | 465 | 110  | 993  | 208  |
| TS19014.TW1.16 | 25.7  | 84.8 | 7.45  | 32.5 | 10.2 | 0.69 | 35.4 | 13.3 | 164  | 68.2 | 328 | 80.4 | 753  | 167  |
| TS19014.TW1.17 | 0.63  | 22.2 | 0.60  | 3.89 | 6.92 | 0.45 | 49.0 | 22.6 | 309  | 138  | 679 | 169  | 1594 | 347  |
| TS19014.TW1.18 | 0.88  | 40.9 | 0.75  | 6.21 | 10.3 | 0.84 | 54.2 | 18.9 | 229  | 90.4 | 419 | 96.4 | 863  | 185  |
| TS19014.TW1.19 | 1.65  | 62.1 | 1.25  | 10.1 | 15.7 | 1.11 | 78.6 | 30.5 | 370  | 146  | 664 | 154  | 1369 | 289  |
| TS19014.TW1.20 | 14.7  | 88.4 | 8.34  | 47.8 | 31.0 | 1.42 | 90.8 | 32.6 | 373  | 143  | 642 | 148  | 1319 | 275  |
| TS19014.TW1.21 | 0.067 | 19.6 | 0.091 | 1.07 | 2.35 | 0.28 | 16.6 | 6.49 | 82.7 | 36.2 | 179 | 44.2 | 426  | 95.6 |
| TS19014.TW1.22 | 0.040 | 24.1 | 0.11  | 1.44 | 5.00 | 0.25 | 35.9 | 15.0 | 203  | 85.8 | 409 | 98.9 | 916  | 196  |



|                |      |      |      |      |      |      |      |      |     |      |      |      |      |     |
|----------------|------|------|------|------|------|------|------|------|-----|------|------|------|------|-----|
| TS19014.TW1.23 | 3.59 | 41.2 | 2.73 | 15.5 | 20.3 | 1.66 | 97.1 | 44.6 | 556 | 228  | 1067 | 252  | 2249 | 462 |
| TS19014.TW1.24 | 0.96 | 24.5 | 0.47 | 2.53 | 4.26 | 0.37 | 28.7 | 13.1 | 177 | 76.1 | 379  | 91.7 | 869  | 192 |
| TS19014.TW1.25 | 0.76 | 58.3 | 0.92 | 11.6 | 17.2 | 1.48 | 82.4 | 27.7 | 330 | 128  | 567  | 128  | 1118 | 231 |

Xianping pluton TS19014-3

|                |      |      |       |      |      |      |      |      |     |      |      |      |      |     |
|----------------|------|------|-------|------|------|------|------|------|-----|------|------|------|------|-----|
| TS19014.TW3.01 | 7.12 | 52.2 | 4.53  | 25.2 | 21.3 | 1.14 | 94.6 | 40.4 | 554 | 245  | 1292 | 318  | 3131 | 681 |
| TS19014.TW3.02 | 15.3 | 83.5 | 7.56  | 38.3 | 23.1 | 1.23 | 71.9 | 25.7 | 301 | 113  | 521  | 118  | 1091 | 214 |
| TS19014.TW3.03 | 1.50 | 45.9 | 0.74  | 6.46 | 8.87 | 0.69 | 43.2 | 16.1 | 199 | 79.4 | 378  | 87.6 | 835  | 172 |
| TS19014.TW3.04 | 4.93 | 44.9 | 2.64  | 15.8 | 17.8 | 2.61 | 70.2 | 25.7 | 301 | 113  | 531  | 123  | 1181 | 245 |
| TS19014.TW3.05 | 0.13 | 36.5 | 0.26  | 2.76 | 5.47 | 0.43 | 36.2 | 13.7 | 184 | 75.7 | 365  | 84.9 | 826  | 173 |
| TS19014.TW3.06 | 0.60 | 29.6 | 0.54  | 3.96 | 6.25 | 0.47 | 32.1 | 12.8 | 158 | 62.9 | 298  | 67.6 | 651  | 133 |
| TS19014.TW3.07 | 5.58 | 56.7 | 4.24  | 23.3 | 36.9 | 4.46 | 189  | 72.5 | 870 | 341  | 1627 | 382  | 3616 | 718 |
| TS19014.TW3.08 | 1.19 | 19.4 | 0.85  | 5.37 | 8.98 | 0.42 | 51.0 | 20.1 | 269 | 115  | 563  | 133  | 1284 | 269 |
| TS19014.TW3.09 |      | 21.1 | 0.061 | 1.05 | 4.51 | 0.28 | 38.8 | 16.2 | 223 | 94.8 | 471  | 112  | 1077 | 223 |
| TS19014.TW3.10 | 0.49 | 17.2 | 0.38  | 2.61 | 4.68 | 0.30 | 28.9 | 12.5 | 169 | 70.2 | 351  | 83.6 | 817  | 174 |
| TS19014.TW3.11 | 0.82 | 26.6 | 0.62  | 3.02 | 6.28 | 0.39 | 41.3 | 16.6 | 217 | 92.0 | 444  | 106  | 1021 | 210 |
| TS19014.TW3.12 | 0.30 | 24.2 | 0.27  | 3.21 | 6.56 | 0.47 | 36.8 | 15.0 | 198 | 81.6 | 397  | 93.3 | 893  | 186 |
| TS19014.TW3.13 | 0.18 | 16.7 | 0.21  | 2.05 | 4.26 | 0.17 | 26.5 | 11.6 | 159 | 66.6 | 335  | 79.3 | 777  | 164 |
| TS19014.TW3.14 | 4.40 | 51.9 | 1.77  | 10.5 | 8.39 | 0.74 | 42.9 | 16.3 | 198 | 78.3 | 367  | 86.3 | 810  | 169 |
| TS19014.TW3.15 | 3.31 | 34.6 | 2.27  | 11.3 | 12.9 | 0.83 | 52.4 | 22.2 | 306 | 124  | 602  | 142  | 1383 | 285 |
| TS19014.TW3.16 | 5.38 | 47.9 | 2.83  | 16.0 | 13.6 | 1.17 | 54.8 | 19.3 | 231 | 89.8 | 421  | 96.4 | 918  | 187 |
| TS19014.TW3.17 | 7.07 | 75.4 | 5.99  | 28.6 | 24.9 | 5.48 | 96.1 | 37.7 | 487 | 195  | 924  | 214  | 1965 | 390 |
| TS19014.TW3.18 | 2.40 | 37.6 | 1.31  | 8.58 | 10.3 | 0.81 | 43.9 | 15.7 | 185 | 70.2 | 315  | 72.2 | 654  | 136 |
| TS19014.TW3.19 | 0.45 | 34.3 | 0.55  | 3.84 | 6.23 | 0.47 | 29.1 | 11.8 | 148 | 59.6 | 282  | 65.8 | 627  | 129 |
| TS19014.TW3.20 | 0.50 | 15.4 | 0.45  | 3.02 | 7.02 | 0.26 | 40.8 | 19.0 | 262 | 114  | 570  | 136  | 1318 | 278 |
| TS19014.TW3.21 | 20.6 | 87.6 | 6.68  | 35.0 | 19.0 | 1.56 | 62.8 | 20.4 | 222 | 81.8 | 350  | 75.3 | 666  | 132 |
| TS19014.TW3.22 | 1.35 | 64.4 | 1.60  | 9.61 | 12.5 | 0.56 | 47.6 | 20.8 | 268 | 105  | 487  | 113  | 1044 | 212 |

|                |      |      |      |      |      |      |      |      |     |      |     |       |      |     |
|----------------|------|------|------|------|------|------|------|------|-----|------|-----|-------|------|-----|
| TS19014.TW3.23 | 1.11 | 25.2 | 1.00 | 5.26 | 7.46 | 0.72 | 37.1 | 16.2 | 207 | 86.6 | 413 | 100.0 | 982  | 206 |
| TS19014.TW3.24 | 45.2 | 154  | 11.8 | 52.1 | 16.0 | 0.87 | 48.3 | 16.3 | 196 | 78.0 | 354 | 80.8  | 754  | 152 |
| TS19014.TW3.25 | 0.19 | 25.3 | 0.31 | 2.48 | 5.91 | 0.39 | 34.7 | 15.7 | 216 | 90.1 | 436 | 104   | 1023 | 217 |

---

Supplementary table.3 Whole-rock major and trace element data of the LP and XP in the western section of the NQO

| Sample                             | Liqiao pluton   |                 |                 |                 |                 |                 |                 |                 |                 |                 |                 |                 |                 |                 |                 |
|------------------------------------|-----------------|-----------------|-----------------|-----------------|-----------------|-----------------|-----------------|-----------------|-----------------|-----------------|-----------------|-----------------|-----------------|-----------------|-----------------|
|                                    | TS19001<br>/DH1 | TS1900<br>1/DH3 | TS19001<br>/DH4 | TS1900<br>2/DH1 | TS1900<br>3/DH1 | TS1900<br>4/DH1 | TS1900<br>4/DH2 | TS19005<br>/DH1 | TS1900<br>5/DH2 | TS1900<br>5/DH3 | TS1900<br>6/DH1 | TS1900<br>6/DH2 | TS1900<br>7/DH1 | TS1900<br>7/DH2 | TS1900<br>7/DH3 |
| Majorelement(wt.%)                 |                 |                 |                 |                 |                 |                 |                 |                 |                 |                 |                 |                 |                 |                 |                 |
| SiO <sub>2</sub>                   | 73.07           | 73.53           | 74.61           | 73.80           | 75.05           | 76.45           | 72.23           | 72.50           | 71.09           | 74.57           | 72.44           | 74.47           | 71.59           | 74.85           | 73.48           |
| TiO <sub>2</sub>                   | 0.25            | 0.23            | 0.19            | 0.24            | 0.19            | 0.25            | 0.16            | 0.29            | 0.22            | 0.25            | 0.26            | 0.23            | 0.28            | 0.18            | 0.30            |
| Al <sub>2</sub> O <sub>3</sub>     | 14.09           | 13.53           | 13.56           | 13.85           | 13.34           | 12.15           | 14.70           | 13.57           | 15.26           | 13.07           | 13.94           | 13.12           | 14.24           | 13.67           | 13.94           |
| Fe <sub>2</sub> O <sub>3T</sub>    | 1.73            | 1.53            | 1.28            | 1.48            | 1.28            | 1.38            | 0.90            | 1.70            | 1.20            | 1.43            | 1.53            | 1.21            | 1.77            | 1.03            | 1.63            |
| MnO                                | 0.07            | 0.07            | 0.06            | 0.06            | 0.04            | 0.06            | 0.04            | 0.07            | 0.05            | 0.05            | 0.05            | 0.05            | 0.06            | 0.03            | 0.04            |
| MgO                                | 0.50            | 0.47            | 0.37            | 0.45            | 0.37            | 0.42            | 0.30            | 0.54            | 0.48            | 0.54            | 0.40            | 0.33            | 0.55            | 0.30            | 0.49            |
| CaO                                | 1.55            | 1.56            | 1.34            | 1.26            | 1.27            | 1.13            | 1.07            | 1.55            | 1.39            | 1.29            | 1.07            | 1.02            | 1.33            | 1.16            | 1.17            |
| Na <sub>2</sub> O                  | 4.00            | 3.92            | 3.58            | 3.97            | 3.48            | 3.27            | 4.05            | 3.98            | 4.07            | 3.67            | 4.22            | 3.87            | 4.06            | 4.01            | 4.00            |
| K <sub>2</sub> O                   | 4.56            | 4.45            | 4.68            | 4.29            | 4.67            | 4.78            | 5.70            | 4.60            | 5.76            | 4.35            | 5.02            | 4.95            | 5.05            | 4.02            | 4.62            |
| P <sub>2</sub> O <sub>5</sub>      | 0.09            | 0.09            | 0.08            | 0.09            | 0.08            | 0.10            | 0.08            | 0.13            | 0.10            | 0.11            | 0.09            | 0.07            | 0.12            | 0.07            | 0.14            |
| LOI                                | 0.48            | 0.57            | 0.50            | 0.74            | 0.54            | 0.41            | 0.66            | 0.82            | 0.58            | 0.89            | 0.68            | 0.79            | 1.01            | 0.97            | 0.94            |
| TOTAL                              | 100.39          | 99.95           | 100.25          | 100.23          | 100.31          | 100.40          | 99.89           | 99.75           | 100.20          | 100.22          | 99.70           | 100.11          | 100.06          | 100.29          | 100.75          |
| Na <sub>2</sub> O+K <sub>2</sub> O | 8.56            | 8.37            | 8.26            | 8.26            | 8.15            | 8.05            | 9.75            | 8.58            | 9.83            | 8.02            | 9.24            | 8.82            | 9.11            | 8.03            | 8.62            |
| Na <sub>2</sub> O/K <sub>2</sub> O | 0.88            | 0.88            | 0.76            | 0.93            | 0.75            | 0.68            | 0.71            | 0.87            | 0.71            | 0.84            | 0.84            | 0.78            | 0.80            | 1.00            | 0.87            |
| A/CNK                              | 0.98            | 0.96            | 1.01            | 1.03            | 1.02            | 0.96            | 0.99            | 0.95            | 0.99            | 1.00            | 0.97            | 0.97            | 0.98            | 1.05            | 1.02            |
| σ                                  | 2.44            | 2.29            | 2.16            | 2.22            | 2.07            | 1.94            | 3.25            | 2.50            | 3.44            | 2.04            | 2.90            | 2.47            | 2.90            | 2.02            | 2.44            |
| Mg#                                | 40.25           | 41.72           | 40.25           | 41.47           | 40.25           | 41.50           | 43.72           | 42.54           | 48.25           | 46.81           | 37.86           | 38.86           | 42.00           | 40.43           | 41.20           |
| Traceelement(ppm)                  |                 |                 |                 |                 |                 |                 |                 |                 |                 |                 |                 |                 |                 |                 |                 |
| Ti                                 | 1498            | 1378            | 1138            | 1438            | 1138            | 1498            | 959             | 1737            | 1318            | 1498            | 1558            | 1378            | 1677            | 1078            | 1797            |

|    |        |        |        |        |       |        |        |        |        |        |        |        |        |        |        |
|----|--------|--------|--------|--------|-------|--------|--------|--------|--------|--------|--------|--------|--------|--------|--------|
| P  | 393    | 393    | 349    | 393    | 349   | 436    | 349    | 567    | 436    | 480    | 393    | 305    | 524    | 305    | 611    |
| K  | 37853  | 36939  | 38849  | 35611  | 38766 | 39679  | 47316  | 38185  | 47814  | 36109  | 41671  | 41090  | 41920  | 33370  | 38351  |
| Li | 33.03  | 36.42  | 33.40  | 23.57  | 17.80 | 25.75  | 13.47  | 25.95  | 18.78  | 19.46  | 10.26  | 6.36   | 15.76  | 8.99   | 11.22  |
| Be | 5.28   | 5.52   | 4.22   | 5.91   | 4.00  | 4.18   | 5.36   | 5.48   | 4.06   | 5.24   | 4.58   | 3.66   | 5.53   | 4.76   | 4.71   |
| Sc | 3.83   | 3.34   | 2.73   | 3.38   | 2.57  | 2.30   | 1.84   | 2.79   | 2.43   | 3.23   | 2.48   | 2.16   | 3.03   | 1.61   | 1.89   |
| V  | 24.3   | 19.0   | 19.1   | 21.7   | 17.6  | 19.0   | 13.1   | 23.0   | 19.2   | 22.9   | 19.0   | 14.4   | 25.2   | 17.8   | 27.3   |
| Cr | 4.21   | 4.06   | 4.16   | 4.02   | 4.36  | 4.75   | 2.89   | 4.92   | 5.36   | 4.83   | 4.25   | 5.92   | 5.18   | 5.46   | 7.27   |
| Co | 2.32   | 3.38   | 1.92   | 1.95   | 1.88  | 1.81   | 1.29   | 2.31   | 2.00   | 2.41   | 1.70   | 1.35   | 2.21   | 1.37   | 2.31   |
| Ni | 1.85   | 1.64   | 1.52   | 1.72   | 1.60  | 2.26   | 1.59   | 2.89   | 2.91   | 3.13   | 1.59   | 1.22   | 2.18   | 1.05   | 2.48   |
| Cu | 3.81   | 79.43  | 4.69   | 5.29   | 4.34  | 3.23   | 1.93   | 2.67   | 8.13   | 5.15   | 17.48  | 5.11   | 2.32   | 3.48   | 8.00   |
| Zn | 41     | 38     | 33     | 40     | 33    | 35     | 27     | 44     | 30     | 35     | 35     | 34     | 33     | 21     | 29     |
| Ga | 20.6   | 19.6   | 17.6   | 20.1   | 18.1  | 15.7   | 18.5   | 19.9   | 17.3   | 16.8   | 18.3   | 16.1   | 19.1   | 17.4   | 18.0   |
| Rb | 215    | 220    | 267    | 207    | 191   | 227    | 262    | 198    | 202    | 210    | 163    | 159    | 162    | 169    | 165    |
| Sr | 358    | 335    | 314    | 323    | 301   | 325    | 343    | 341    | 575    | 420    | 397    | 276    | 399    | 353    | 360    |
| Y  | 13.48  | 11.89  | 10.34  | 13.43  | 11.10 | 15.04  | 8.12   | 16.99  | 10.67  | 12.72  | 19.49  | 17.62  | 11.37  | 8.58   | 11.67  |
| Zr | 245    | 220    | 178    | 231    | 185   | 203    | 143    | 221    | 183    | 210    | 248    | 211    | 236    | 154    | 253    |
| Nb | 22.5   | 22.4   | 16.5   | 20.6   | 16.4  | 29.4   | 19.7   | 34.0   | 17.4   | 21.1   | 38.5   | 34.7   | 26.3   | 17.4   | 23.3   |
| Mo | 0.27   | 8.36   | 1.90   | 0.68   | 0.29  | 0.32   | 0.18   | 0.42   | 0.44   | 0.26   | 0.30   | 0.30   | 0.32   | 0.22   | 0.40   |
| Cd | 0.04   | 0.05   | <0.000 | 0.05   | 0.00  | 0.02   | <0.000 | 0.00   | <0.000 | 0.01   | 0.05   | 0.02   | 0.04   | <0.000 | 0.12   |
| In | 0.02   | 0.04   | 0.02   | 0.04   | 0.02  | 0.02   | 0.01   | 0.02   | 0.01   | 0.02   | 0.04   | 0.02   | 0.02   | 0.02   | 0.02   |
| Cs | 1.84   | 2.12   | 2.53   | 1.53   | 1.85  | 2.39   | 2.86   | 1.54   | 1.77   | 2.29   | 1.29   | 1.28   | 1.39   | 1.87   | 1.71   |
| Ba | 884    | 807    | 876    | 891    | 698   | 764    | 1027   | 705    | 1877   | 1209   | 826    | 715    | 1308   | 688    | 1177   |
| La | 66.35  | 63.67  | 47.65  | 53.97  | 52.36 | 57.77  | 52.70  | 76.20  | 44.80  | 56.44  | 108.25 | 95.34  | 68.10  | 66.79  | 75.30  |
| Ce | 116.70 | 111.02 | 85.11  | 102.34 | 93.45 | 108.06 | 87.20  | 138.40 | 83.81  | 105.35 | 201.29 | 168.78 | 119.26 | 107.82 | 130.23 |
| Pr | 11.89  | 11.27  | 8.83   | 10.41  | 9.57  | 11.62  | 8.35   | 14.04  | 9.06   | 10.88  | 19.97  | 16.76  | 12.27  | 10.05  | 13.20  |
| Nd | 36.54  | 33.76  | 26.99  | 31.77  | 28.97 | 36.15  | 24.19  | 42.56  | 28.64  | 34.58  | 58.57  | 47.40  | 37.29  | 27.89  | 39.28  |

|                      |       |       |       |       |       |       |       |       |       |       |       |       |       |       |       |
|----------------------|-------|-------|-------|-------|-------|-------|-------|-------|-------|-------|-------|-------|-------|-------|-------|
| Sm                   | 4.99  | 4.62  | 3.77  | 4.64  | 4.00  | 5.25  | 3.05  | 6.04  | 4.17  | 4.99  | 7.31  | 6.38  | 5.05  | 3.39  | 5.23  |
| Eu                   | 1.11  | 0.99  | 0.92  | 1.05  | 0.89  | 1.10  | 0.87  | 1.13  | 1.33  | 1.26  | 1.28  | 1.09  | 1.27  | 0.90  | 1.29  |
| Gd                   | 4.62  | 4.21  | 3.41  | 4.25  | 3.67  | 4.65  | 2.84  | 5.31  | 3.59  | 4.29  | 6.57  | 5.64  | 4.40  | 3.21  | 4.63  |
| Tb                   | 0.48  | 0.44  | 0.37  | 0.46  | 0.39  | 0.51  | 0.28  | 0.58  | 0.40  | 0.48  | 0.70  | 0.61  | 0.45  | 0.31  | 0.47  |
| Dy                   | 2.25  | 1.98  | 1.76  | 2.25  | 1.86  | 2.53  | 1.33  | 2.83  | 1.86  | 2.27  | 3.33  | 2.91  | 2.02  | 1.38  | 2.09  |
| Ho                   | 0.44  | 0.39  | 0.34  | 0.43  | 0.35  | 0.49  | 0.25  | 0.55  | 0.35  | 0.42  | 0.62  | 0.56  | 0.37  | 0.27  | 0.38  |
| Er                   | 1.37  | 1.19  | 1.06  | 1.31  | 1.10  | 1.51  | 0.82  | 1.68  | 1.06  | 1.28  | 1.99  | 1.75  | 1.15  | 0.85  | 1.18  |
| Tm                   | 0.20  | 0.17  | 0.15  | 0.20  | 0.16  | 0.22  | 0.12  | 0.24  | 0.14  | 0.18  | 0.29  | 0.25  | 0.16  | 0.12  | 0.16  |
| Yb                   | 1.43  | 1.21  | 1.04  | 1.41  | 1.12  | 1.49  | 0.88  | 1.73  | 0.99  | 1.21  | 1.89  | 1.77  | 1.15  | 0.93  | 1.10  |
| Lu                   | 0.23  | 0.19  | 0.17  | 0.22  | 0.17  | 0.23  | 0.14  | 0.26  | 0.15  | 0.18  | 0.26  | 0.25  | 0.18  | 0.15  | 0.17  |
| Hf                   | 6.68  | 5.56  | 4.78  | 5.99  | 4.78  | 5.60  | 3.98  | 6.12  | 4.58  | 5.60  | 6.75  | 5.91  | 6.14  | 4.40  | 6.54  |
| Ta                   | 1.75  | 1.51  | 1.14  | 1.39  | 1.16  | 2.16  | 1.39  | 2.48  | 1.25  | 1.48  | 2.73  | 2.51  | 1.79  | 1.13  | 1.51  |
| Pb                   | 41    | 39    | 44    | 36    | 39    | 42    | 46    | 42    | 37    | 43    | 50    | 47    | 39    | 35    | 38    |
| Bi                   | 0.03  | 0.06  | 0.07  | 0.04  | 0.05  | 0.09  | 0.10  | 0.05  | 0.07  | 0.15  | 0.08  | 0.08  | 0.05  | 0.07  | 0.05  |
| Th                   | 47    | 37    | 35    | 33    | 36    | 61    | 45    | 70    | 20    | 26    | 72    | 85    | 39    | 54    | 40    |
| U                    | 4.04  | 5.68  | 7.60  | 2.71  | 3.62  | 5.61  | 3.54  | 8.53  | 2.32  | 4.02  | 9.10  | 5.97  | 5.45  | 6.24  | 3.94  |
| $\delta$ Eu          | 0.70  | 0.67  | 0.77  | 0.71  | 0.70  | 0.67  | 0.89  | 0.60  | 1.03  | 0.81  | 0.55  | 0.54  | 0.81  | 0.82  | 0.79  |
| $\delta$ Ce          | 0.93  | 0.92  | 0.93  | 0.98  | 0.94  | 0.95  | 0.91  | 0.95  | 0.95  | 0.96  | 0.97  | 0.94  | 0.92  | 0.90  | 0.92  |
| REE                  | 249   | 235   | 182   | 215   | 198   | 232   | 183   | 292   | 180   | 224   | 412   | 349   | 253   | 224   | 275   |
| LREE                 | 238   | 225   | 173   | 204   | 189   | 220   | 176   | 278   | 172   | 214   | 397   | 336   | 243   | 217   | 265   |
| HREE                 | 11.02 | 9.78  | 8.30  | 10.53 | 8.82  | 11.63 | 6.66  | 13.18 | 8.54  | 10.31 | 15.65 | 13.74 | 9.88  | 7.22  | 10.18 |
| LREE/H<br>REE        | 21.56 | 23.04 | 20.88 | 19.39 | 21.46 | 18.91 | 26.48 | 21.12 | 20.12 | 20.71 | 25.35 | 24.44 | 24.62 | 30.03 | 25.99 |
| (La/Yb) <sub>N</sub> | 31.28 | 35.48 | 30.89 | 25.81 | 31.52 | 26.14 | 40.38 | 29.70 | 30.51 | 31.45 | 38.61 | 36.32 | 39.92 | 48.42 | 46.15 |
| (La/Sm) <sub>N</sub> | 8.36  | 8.67  | 7.95  | 7.32  | 8.23  | 6.92  | 10.87 | 7.94  | 6.76  | 7.11  | 9.32  | 9.40  | 8.48  | 12.39 | 9.06  |
| (Gd/Yb) <sub>N</sub> | 2.61  | 2.81  | 2.65  | 2.43  | 2.64  | 2.52  | 2.60  | 2.48  | 2.93  | 2.86  | 2.81  | 2.57  | 3.09  | 2.79  | 3.40  |

*TZr:Zirc  
onsatura  
tiontemp  
eratures*

817 806 794 819 799 804 770 804 788 808 817 805 811 786 825

**TableS2**(continued)

| Sample                             | Xianping pluton |                 |                 |                 |                 |                 |                 |                 |                 |                 |                 |                 |
|------------------------------------|-----------------|-----------------|-----------------|-----------------|-----------------|-----------------|-----------------|-----------------|-----------------|-----------------|-----------------|-----------------|
|                                    | TS19013/<br>DH1 | TS19013/<br>DH2 | TS19014/<br>DH1 | TS19014/<br>DH2 | TS19014/<br>DH3 | TS19014/<br>DH4 | TS19015/<br>DH1 | TS19015/<br>DH2 | TS19016/<br>DH1 | TS19017/<br>DH1 | TS19018/<br>DH1 | TS19019/<br>DH1 |
| Majorelement(wt.%)                 |                 |                 |                 |                 |                 |                 |                 |                 |                 |                 |                 |                 |
| SiO <sub>2</sub>                   | 74.91           | 74.23           | 73.92           | 75.75           | 77.38           | 75.85           | 75.52           | 75.19           | 75.98           | 74.72           | 75.44           | 78.28           |
| TiO <sub>2</sub>                   | 0.04            | 0.05            | 0.07            | 0.09            | 0.09            | 0.14            | 0.10            | 0.08            | 0.10            | 0.08            | 0.16            | 0.15            |
| Al <sub>2</sub> O <sub>3</sub>     | 14.14           | 14.07           | 13.83           | 13.03           | 12.16           | 12.59           | 13.34           | 13.45           | 12.81           | 13.31           | 13.18           | 11.27           |
| Fe <sub>2</sub> O <sub>3T</sub>    | 0.56            | 0.68            | 0.88            | 1.08            | 1.18            | 1.91            | 1.08            | 0.88            | 1.20            | 1.00            | 1.66            | 1.46            |
| MnO                                | 0.05            | 0.07            | 0.05            | 0.06            | 0.06            | 0.08            | 0.05            | 0.05            | 0.06            | 0.05            | 0.07            | 0.06            |
| MgO                                | 0.13            | 0.13            | 0.13            | 0.15            | 0.15            | 0.21            | 0.18            | 0.15            | 0.19            | 0.18            | 0.25            | 0.26            |
| CaO                                | 0.88            | 0.93            | 0.86            | 1.01            | 0.90            | 0.99            | 1.06            | 0.83            | 1.03            | 0.99            | 0.96            | 0.98            |
| Na <sub>2</sub> O                  | 4.02            | 4.39            | 3.90            | 3.85            | 3.66            | 3.59            | 3.66            | 3.66            | 3.75            | 3.82            | 3.61            | 3.26            |
| K <sub>2</sub> O                   | 5.34            | 4.98            | 5.04            | 4.66            | 4.10            | 4.13            | 4.62            | 5.18            | 4.54            | 4.73            | 4.62            | 3.57            |
| P <sub>2</sub> O <sub>5</sub>      | 0.02            | 0.02            | 0.03            | 0.03            | 0.04            | 0.05            | 0.03            | 0.03            | 0.04            | 0.03            | 0.06            | 0.06            |
| LOI                                | 0.53            | 0.55            | 1.24            | 0.63            | 0.53            | 0.57            | 0.57            | 0.43            | 0.45            | 0.48            | 0.66            | 0.69            |
| TOTAL                              | 100.62          | 100.10          | 99.95           | 100.34          | 100.25          | 100.11          | 100.21          | 99.93           | 100.15          | 99.39           | 100.67          | 100.04          |
| Na <sub>2</sub> O+K <sub>2</sub> O | 9.36            | 9.37            | 8.94            | 8.51            | 7.76            | 7.72            | 8.28            | 8.84            | 8.29            | 8.55            | 8.23            | 6.83            |
| Na <sub>2</sub> O/K <sub>2</sub> O | 0.75            | 0.88            | 0.77            | 0.83            | 0.89            | 0.87            | 0.79            | 0.71            | 0.83            | 0.81            | 0.78            | 0.91            |
| A/CNK                              | 1.01            | 0.98            | 1.03            | 0.99            | 1.01            | 1.03            | 1.03            | 1.02            | 0.99            | 1.01            | 1.04            | 1.02            |
| σ                                  | 2.75            | 2.81            | 2.58            | 2.21            | 1.75            | 1.81            | 2.11            | 2.43            | 2.08            | 2.30            | 2.09            | 1.32            |
| Mg#                                | 35.11           | 30.82           | 25.61           | 24.45           | 22.85           | 20.40           | 27.98           | 28.43           | 26.95           | 29.55           | 25.98           | 29.33           |

## Traceelement(ppm)

|    |       |       |       |       |       |       |       |       |       |       |       |       |
|----|-------|-------|-------|-------|-------|-------|-------|-------|-------|-------|-------|-------|
| Ti | 240   | 300   | 419   | 539   | 539   | 839   | 599   | 479   | 599   | 479   | 959   | 899   |
| P  | 87    | 87    | 131   | 131   | 175   | 218   | 131   | 131   | 175   | 131   | 262   | 262   |
| K  | 44327 | 41339 | 41837 | 38683 | 34034 | 34283 | 38351 | 42999 | 37687 | 39264 | 38351 | 29635 |
| Li | 25.80 | 39.89 | 14.82 | 18.59 | 10.18 | 37.41 | 12.52 | 7.72  | 39.28 | 21.74 | 22.43 | 13.41 |
| Be | 9.00  | 10.92 | 6.53  | 6.25  | 6.47  | 6.74  | 7.14  | 6.29  | 6.74  | 7.32  | 6.71  | 6.30  |
| Sc | 1.55  | 1.87  | 1.74  | 1.87  | 2.08  | 2.69  | 1.70  | 1.08  | 1.54  | 1.35  | 2.39  | 2.35  |
| V  | 1.99  | 1.78  | 2.51  | 2.62  | 2.75  | 4.28  | 3.01  | 2.36  | 3.59  | 2.99  | 4.57  | 4.86  |
| Cr | 1.82  | 1.56  | 2.65  | 1.66  | 1.56  | 1.60  | 5.36  | 2.92  | 2.08  | 1.42  | 1.74  | 4.79  |
| Co | 0.39  | 0.39  | 0.52  | 0.65  | 0.72  | 1.04  | 0.76  | 0.59  | 0.78  | 0.64  | 1.21  | 1.20  |
| Ni | 0.38  | 0.26  | 0.33  | 0.33  | 0.32  | 0.87  | 0.55  | 0.40  | 0.40  | 0.36  | 0.49  | 0.66  |
| Cu | 1.34  | 0.89  | 0.87  | 1.01  | 0.94  | 1.39  | 1.33  | 1.17  | 1.01  | 0.96  | 1.14  | 1.16  |
| Zn | 19.5  | 25.8  | 23.8  | 31.0  | 29.9  | 42.0  | 29.9  | 20.8  | 32.5  | 24.8  | 41.2  | 39.1  |
| Ga | 22.0  | 22.9  | 20.0  | 19.9  | 19.5  | 21.9  | 20.1  | 17.5  | 19.5  | 19.1  | 18.6  | 16.3  |
| Rb | 477   | 443   | 324   | 289   | 270   | 303   | 281   | 300   | 282   | 289   | 241   | 189   |
| Sr | 41    | 39    | 46    | 53    | 43    | 47    | 56    | 50    | 50    | 53    | 74    | 74    |
| Y  | 42    | 38    | 28    | 31    | 41    | 41    | 32    | 20    | 30    | 26    | 28    | 29    |
| Zr | 91    | 85    | 106   | 128   | 126   | 146   | 136   | 110   | 169   | 146   | 178   | 187   |
| Nb | 46    | 41    | 41    | 54    | 62    | 65    | 40    | 35    | 52    | 37    | 37    | 38    |
| Mo | 0.23  | 0.26  | 0.22  | 0.24  | 0.33  | 0.59  | 0.41  | 0.38  | 0.22  | 0.24  | 0.57  | 0.71  |
| Cd | 0.22  | 0.36  | 0.06  | 0.23  | 0.24  | 0.28  | 0.23  | 0.23  | 0.29  | 0.22  | 0.35  | 0.31  |
| In | 0.07  | 0.07  | 0.05  | 0.05  | 0.05  | 0.09  | 0.06  | 0.03  | 0.04  | 0.06  | 0.05  | 0.05  |
| Cs | 5.86  | 6.89  | 2.21  | 2.22  | 1.84  | 3.38  | 2.00  | 2.07  | 3.03  | 2.55  | 2.43  | 2.12  |
| Ba | 180   | 162   | 239   | 267   | 159   | 185   | 207   | 224   | 201   | 214   | 271   | 206   |
| La | 12.17 | 17.71 | 24.59 | 17.74 | 30.14 | 29.98 | 32.28 | 18.42 | 31.11 | 28.58 | 42.24 | 44.17 |
| Ce | 26.72 | 37.44 | 51.94 | 36.81 | 63.03 | 67.43 | 68.66 | 37.31 | 67.50 | 61.61 | 83.51 | 90.49 |

|                      |       |       |       |       |       |       |       |       |       |       |       |       |
|----------------------|-------|-------|-------|-------|-------|-------|-------|-------|-------|-------|-------|-------|
| Pr                   | 2.97  | 4.21  | 5.81  | 4.16  | 6.79  | 6.89  | 7.96  | 4.29  | 7.47  | 6.68  | 9.47  | 10.07 |
| Nd                   | 10.98 | 15.34 | 20.90 | 15.39 | 24.35 | 24.78 | 27.10 | 15.21 | 26.30 | 23.37 | 30.99 | 32.95 |
| Sm                   | 3.23  | 3.91  | 4.66  | 3.94  | 5.87  | 5.77  | 5.97  | 3.45  | 5.85  | 4.94  | 5.91  | 6.12  |
| Eu                   | 0.31  | 0.31  | 0.38  | 0.40  | 0.36  | 0.37  | 0.49  | 0.38  | 0.41  | 0.44  | 0.54  | 0.52  |
| Gd                   | 3.97  | 4.31  | 4.59  | 4.23  | 6.23  | 5.85  | 5.88  | 3.53  | 5.64  | 4.55  | 5.52  | 5.71  |
| Tb                   | 0.84  | 0.80  | 0.75  | 0.81  | 1.11  | 1.03  | 0.93  | 0.58  | 0.94  | 0.74  | 0.82  | 0.87  |
| Dy                   | 6.11  | 5.43  | 4.70  | 5.39  | 7.02  | 6.64  | 5.40  | 3.59  | 5.69  | 4.40  | 4.76  | 5.13  |
| Ho                   | 1.41  | 1.23  | 1.03  | 1.21  | 1.54  | 1.46  | 1.11  | 0.76  | 1.23  | 0.93  | 1.00  | 1.06  |
| Er                   | 4.79  | 4.06  | 3.28  | 3.93  | 4.79  | 4.57  | 3.31  | 2.31  | 3.85  | 2.97  | 3.05  | 3.29  |
| Tm                   | 0.83  | 0.71  | 0.53  | 0.65  | 0.77  | 0.74  | 0.51  | 0.36  | 0.60  | 0.48  | 0.49  | 0.52  |
| Yb                   | 5.99  | 5.20  | 3.69  | 4.50  | 5.17  | 5.12  | 3.50  | 2.53  | 4.19  | 3.44  | 3.37  | 3.60  |
| Lu                   | 0.94  | 0.82  | 0.58  | 0.69  | 0.78  | 0.78  | 0.55  | 0.38  | 0.63  | 0.55  | 0.54  | 0.55  |
| Hf                   | 3.91  | 3.50  | 3.98  | 4.58  | 4.47  | 5.36  | 4.65  | 3.92  | 5.98  | 5.40  | 5.50  | 5.79  |
| Ta                   | 6.40  | 7.46  | 3.21  | 4.02  | 4.44  | 5.14  | 3.49  | 2.80  | 3.30  | 3.17  | 3.37  | 3.24  |
| Pb                   | 59    | 57    | 46    | 52    | 45    | 57    | 49    | 48    | 48    | 46    | 44    | 37    |
| Bi                   | 0.11  | 0.43  | 0.10  | 0.09  | 0.10  | 0.08  | 0.12  | 0.18  | 0.10  | 0.09  | 0.12  | 0.16  |
| Th                   | 27    | 29    | 38    | 38    | 49    | 55    | 49    | 37    | 51    | 50    | 55    | 56    |
| U                    | 8.71  | 9.21  | 6.87  | 8.55  | 9.70  | 10.12 | 7.39  | 6.54  | 8.15  | 7.09  | 6.99  | 8.39  |
| $\delta$ Eu          | 0.26  | 0.23  | 0.25  | 0.30  | 0.18  | 0.19  | 0.25  | 0.33  | 0.22  | 0.28  | 0.28  | 0.26  |
| $\delta$ Ce          | 1.04  | 1.01  | 1.01  | 1.00  | 1.02  | 1.09  | 1.00  | 0.98  | 1.03  | 1.04  | 0.97  | 1.00  |
| REE                  | 81    | 101   | 127   | 100   | 158   | 161   | 164   | 93    | 161   | 144   | 192   | 205   |
| LREE                 | 56    | 79    | 108   | 78    | 131   | 135   | 142   | 79    | 139   | 126   | 173   | 184   |
| HREE                 | 24.9  | 22.6  | 19.2  | 21.4  | 27.4  | 26.2  | 21.2  | 14.0  | 22.8  | 18.1  | 19.6  | 20.7  |
| LREE/HREE            | 2.27  | 3.50  | 5.65  | 3.66  | 4.76  | 5.16  | 6.72  | 5.63  | 6.09  | 6.96  | 8.83  | 8.89  |
| (La/Yb) <sub>N</sub> | 1.37  | 2.30  | 4.49  | 2.66  | 3.93  | 3.95  | 6.22  | 4.91  | 5.01  | 5.60  | 8.45  | 8.27  |
| (La/Sm) <sub>N</sub> | 2.37  | 2.85  | 3.32  | 2.83  | 3.23  | 3.27  | 3.40  | 3.36  | 3.35  | 3.64  | 4.50  | 4.54  |



|                                              |      |      |      |      |      |      |      |      |      |      |      |      |
|----------------------------------------------|------|------|------|------|------|------|------|------|------|------|------|------|
| (Gd/Yb) <sub>N</sub>                         | 0.53 | 0.67 | 1.00 | 0.76 | 0.97 | 0.92 | 1.36 | 1.13 | 1.09 | 1.07 | 1.32 | 1.28 |
| <i>TZr:Zirconsaturationte<br/>mperatures</i> | 738  | 729  | 752  | 765  | 768  | 782  | 774  | 755  | 790  | 778  | 798  | 807  |

---

Supplementary table.4 Zircon Hf isotopic composition of the LP and XP in the western section of the NQO

| Spots                   | $^{176}\text{Hf}/^{177}\text{Hf}$ | $2\sigma$ | $^{176}\text{Yb}/^{177}\text{Hf}$ | $2\sigma$ | $^{176}\text{Lu}/^{177}\text{Hf}$ | $2\sigma$ | zirconU-Pbages | $\varepsilon_{\text{Hf}(t)}$ | $T_{\text{DM1}}(\text{Ma})$ | $T_{\text{DM2}}(\text{Ma})$ |
|-------------------------|-----------------------------------|-----------|-----------------------------------|-----------|-----------------------------------|-----------|----------------|------------------------------|-----------------------------|-----------------------------|
| Liqiao pluton TS19001-3 |                                   |           |                                   |           |                                   |           |                |                              |                             |                             |
| TS19001-302             | 0.282573                          | 0.000018  | 0.033889                          | 0.000183  | 0.001375                          | 0.000007  | 417            | 1.8                          | 971                         | 1291                        |
| TS19001-304             | 0.282539                          | 0.000020  | 0.022030                          | 0.000288  | 0.001042                          | 0.000008  | 433            | 1.0                          | 1010                        | 1352                        |
| TS19001-306             | 0.282600                          | 0.000016  | 0.027064                          | 0.000362  | 0.001232                          | 0.000010  | 432            | 3.1                          | 929                         | 1219                        |
| TS19001-307             | 0.282550                          | 0.000016  | 0.026886                          | 0.000155  | 0.001219                          | 0.000007  | 435            | 1.4                          | 998                         | 1327                        |
| TS19001-308             | 0.282600                          | 0.000017  | 0.040845                          | 0.000684  | 0.001677                          | 0.000014  | 434            | 3.0                          | 940                         | 1226                        |
| TS19001-309             | 0.282526                          | 0.000018  | 0.027843                          | 0.000391  | 0.001287                          | 0.000007  | 434            | 0.5                          | 1035                        | 1383                        |
| TS19001-310             | 0.282597                          | 0.000016  | 0.028282                          | 0.000227  | 0.001310                          | 0.000011  | 422            | 2.7                          | 934                         | 1232                        |
| TS19001-312             | 0.282569                          | 0.000020  | 0.038521                          | 0.000429  | 0.001567                          | 0.000009  | 434            | 1.9                          | 981                         | 1292                        |
| TS19001-313             | 0.282605                          | 0.000016  | 0.033954                          | 0.000207  | 0.001582                          | 0.000009  | 420            | 2.9                          | 930                         | 1220                        |
| TS19001-315             | 0.282565                          | 0.000015  | 0.025117                          | 0.000061  | 0.001257                          | 0.000002  | 433            | 1.9                          | 979                         | 1297                        |
| TS19001-317             | 0.282611                          | 0.000015  | 0.033266                          | 0.000319  | 0.001483                          | 0.000013  | 433            | 3.4                          | 919                         | 1197                        |
| TS19001-319             | 0.282591                          | 0.000018  | 0.029190                          | 0.000240  | 0.001231                          | 0.000006  | 431            | 2.7                          | 941                         | 1239                        |
| TS19001-320             | 0.282560                          | 0.000017  | 0.030111                          | 0.000198  | 0.001407                          | 0.000007  | 430            | 1.6                          | 990                         | 1312                        |
| TS19001-321             | 0.282604                          | 0.000018  | 0.028821                          | 0.000124  | 0.001296                          | 0.000004  | 429            | 3.1                          | 925                         | 1213                        |
| TS19001-322             | 0.282567                          | 0.000015  | 0.026391                          | 0.000394  | 0.001274                          | 0.000011  | 433            | 1.9                          | 977                         | 1293                        |
| Liqiao pluton TS19007-2 |                                   |           |                                   |           |                                   |           |                |                              |                             |                             |
| TS19007-201             | 0.282517                          | 0.000025  | 0.032438                          | 0.000525  | 0.001259                          | 0.000013  | 421            | -0.1                         | 1047                        | 1411                        |
| TS19007-203             | 0.282604                          | 0.000017  | 0.014220                          | 0.000206  | 0.000722                          | 0.000007  | 431            | 3.3                          | 911                         | 1202                        |
| TS19007-204             | 0.282561                          | 0.000019  | 0.034567                          | 0.001511  | 0.001409                          | 0.000053  | 428            | 1.6                          | 989                         | 1311                        |
| TS19007-205             | 0.282569                          | 0.000019  | 0.029236                          | 0.000254  | 0.001179                          | 0.000013  | 425            | 1.9                          | 971                         | 1290                        |
| TS19007-206             | 0.282543                          | 0.000016  | 0.035220                          | 0.001650  | 0.001533                          | 0.000056  | 430            | 0.9                          | 1018                        | 1353                        |
| TS19007-207             | 0.282585                          | 0.000017  | 0.031937                          | 0.000196  | 0.001495                          | 0.000006  | 431            | 2.5                          | 956                         | 1257                        |

|                           |          |          |          |          |          |          |     |       |      |      |
|---------------------------|----------|----------|----------|----------|----------|----------|-----|-------|------|------|
| TS19007-208               | 0.282592 | 0.000021 | 0.032113 | 0.000703 | 0.001300 | 0.000026 | 432 | 2.8   | 941  | 1237 |
| TS19007-209               | 0.282554 | 0.000019 | 0.038762 | 0.000393 | 0.001638 | 0.000015 | 432 | 1.3   | 1005 | 1329 |
| TS19007-210               | 0.282563 | 0.000018 | 0.022482 | 0.000071 | 0.001032 | 0.000004 | 429 | 1.8   | 976  | 1299 |
| TS19007-211               | 0.282595 | 0.000018 | 0.027437 | 0.000188 | 0.001141 | 0.000011 | 430 | 2.9   | 933  | 1229 |
| TS19007-212               | 0.282600 | 0.000020 | 0.067369 | 0.001365 | 0.002697 | 0.000053 | 426 | 2.5   | 966  | 1248 |
| TS19007-213               | 0.282555 | 0.000020 | 0.028653 | 0.000186 | 0.001124 | 0.000007 | 430 | 1.5   | 989  | 1318 |
| TS19007-214               | 0.282529 | 0.000022 | 0.026589 | 0.000367 | 0.000977 | 0.000010 | 432 | 0.6   | 1023 | 1374 |
| TS19007-216               | 0.282560 | 0.000018 | 0.027594 | 0.000676 | 0.001201 | 0.000027 | 429 | 1.6   | 985  | 1310 |
| TS19007-217               | 0.282561 | 0.000018 | 0.031421 | 0.000215 | 0.001415 | 0.000010 | 431 | 1.6   | 988  | 1309 |
| TS19007-221               | 0.282564 | 0.000020 | 0.030850 | 0.000228 | 0.001417 | 0.000008 | 489 | 3.0   | 984  | 1269 |
| Xianping pluton TS19014-1 |          |          |          |          |          |          |     |       |      |      |
| TS19014-101               | 0.282050 | 0.000018 | 0.065829 | 0.001392 | 0.002384 | 0.000018 | 427 | -16.8 | 1756 | 2459 |
| TS19014-102               | 0.282099 | 0.000017 | 0.031140 | 0.000652 | 0.001299 | 0.000024 | 429 | -14.7 | 1637 | 2332 |
| TS19014-103               | 0.282015 | 0.000018 | 0.049450 | 0.000487 | 0.002017 | 0.000021 | 423 | -18.0 | 1788 | 2530 |
| TS19014-104               | 0.282139 | 0.000020 | 0.078492 | 0.001190 | 0.003110 | 0.000049 | 425 | -13.9 | 1660 | 2276 |
| TS19014-105               | 0.282042 | 0.000016 | 0.071550 | 0.001212 | 0.002750 | 0.000042 | 409 | -17.6 | 1785 | 2492 |
| TS19014-107               | 0.282062 | 0.000016 | 0.048676 | 0.000734 | 0.002000 | 0.000027 | 432 | -16.2 | 1720 | 2423 |
| TS19014-108               | 0.282099 | 0.000015 | 0.040890 | 0.000455 | 0.001628 | 0.000009 | 418 | -15.1 | 1651 | 2344 |
| TS19014-109               | 0.282094 | 0.000015 | 0.053632 | 0.000172 | 0.002113 | 0.000002 | 426 | -15.2 | 1679 | 2357 |
| TS19014-110               | 0.282118 | 0.000017 | 0.059975 | 0.000591 | 0.002245 | 0.000005 | 421 | -14.5 | 1651 | 2310 |
| TS19014-111               | 0.282055 | 0.000017 | 0.062829 | 0.000445 | 0.002211 | 0.000015 | 423 | -16.7 | 1740 | 2447 |
| TS19014-112               | 0.282124 | 0.000017 | 0.082388 | 0.000247 | 0.003434 | 0.000010 | 423 | -14.6 | 1698 | 2317 |
| TS19014-113               | 0.282039 | 0.000017 | 0.037643 | 0.000711 | 0.001460 | 0.000017 | 417 | -17.1 | 1727 | 2471 |
| TS19014-114               | 0.282087 | 0.000017 | 0.056828 | 0.000353 | 0.002284 | 0.000008 | 412 | -15.8 | 1697 | 2383 |
| TS19014-115               | 0.282102 | 0.000019 | 0.074501 | 0.001387 | 0.002927 | 0.000049 | 421 | -15.3 | 1706 | 2358 |
| TS19014-116               | 0.282099 | 0.000018 | 0.045738 | 0.000701 | 0.001787 | 0.000019 | 420 | -15.0 | 1657 | 2343 |

Xianping pluton TS19014-3

|             |          |          |          |          |          |          |     |       |      |      |
|-------------|----------|----------|----------|----------|----------|----------|-----|-------|------|------|
| TS19014-302 | 0.282047 | 0.000029 | 0.068770 | 0.001452 | 0.002709 | 0.000053 | 425 | -17.1 | 1776 | 2472 |
| TS19014-303 | 0.282028 | 0.000017 | 0.047229 | 0.000331 | 0.001899 | 0.000008 | 427 | -17.5 | 1764 | 2499 |
| TS19014-305 | 0.282120 | 0.000017 | 0.058194 | 0.001151 | 0.002327 | 0.000042 | 419 | -14.5 | 1652 | 2307 |
| TS19014-306 | 0.282120 | 0.000018 | 0.054918 | 0.000620 | 0.002176 | 0.000023 | 423 | -14.4 | 1645 | 2303 |
| TS19014-308 | 0.282050 | 0.000016 | 0.053294 | 0.000231 | 0.002265 | 0.000008 | 413 | -17.1 | 1750 | 2464 |
| TS19014-309 | 0.282005 | 0.000018 | 0.061188 | 0.001039 | 0.002563 | 0.000037 | 428 | -18.5 | 1830 | 2560 |
| TS19014-310 | 0.282143 | 0.000017 | 0.062960 | 0.000930 | 0.002522 | 0.000021 | 424 | -13.6 | 1628 | 2259 |
| TS19014-311 | 0.282044 | 0.000018 | 0.046801 | 0.001124 | 0.001906 | 0.000048 | 426 | -16.9 | 1741 | 2463 |
| TS19014-312 | 0.282118 | 0.000018 | 0.054540 | 0.000223 | 0.002168 | 0.000010 | 426 | -14.4 | 1647 | 2305 |
| TS19014-313 | 0.282042 | 0.000014 | 0.047716 | 0.000240 | 0.001989 | 0.000009 | 417 | -17.2 | 1748 | 2474 |
| TS19014-314 | 0.282124 | 0.000019 | 0.082867 | 0.002035 | 0.002952 | 0.000077 | 415 | -14.6 | 1675 | 2313 |
| TS19014-315 | 0.282117 | 0.000017 | 0.064742 | 0.000494 | 0.002515 | 0.000018 | 423 | -14.6 | 1664 | 2315 |
| TS19014-317 | 0.282045 | 0.000017 | 0.098536 | 0.000906 | 0.003987 | 0.000044 | 408 | -17.8 | 1843 | 2505 |
| TS19014-319 | 0.282122 | 0.000020 | 0.052094 | 0.000387 | 0.002000 | 0.000010 | 426 | -14.2 | 1635 | 2294 |
| TS19014-320 | 0.282072 | 0.000017 | 0.062001 | 0.000216 | 0.002564 | 0.000009 | 423 | -16.2 | 1732 | 2415 |

---
